# Supplementary material for: Comparative Genomic Analysis Provides Insights into the Evolution and Genetic Diversity of Community-Genotype Sequence Type 72 Staphylococcus aureus Isolates
Source: PubMed Central journal article supplement (PMC8547429; doi:10.1128/msystems.00986-21), 2021-09-07
Supplement: msystems.00986-21-sf001.pdf [file msystems.00986-21-sf001.pdf]

**A**

● MRSA  
● MSSA

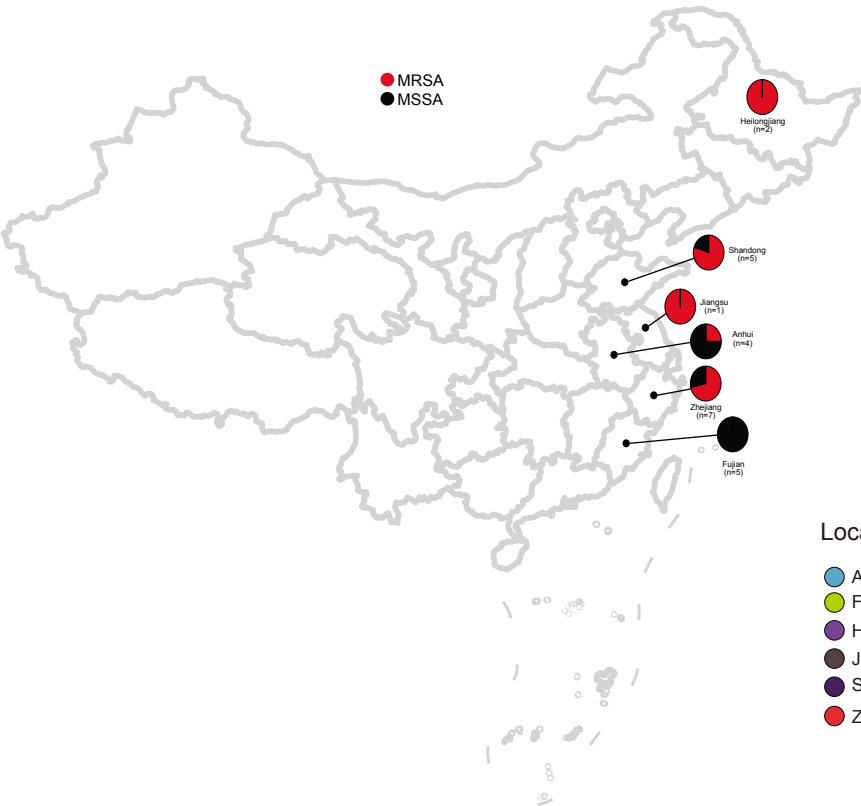**C**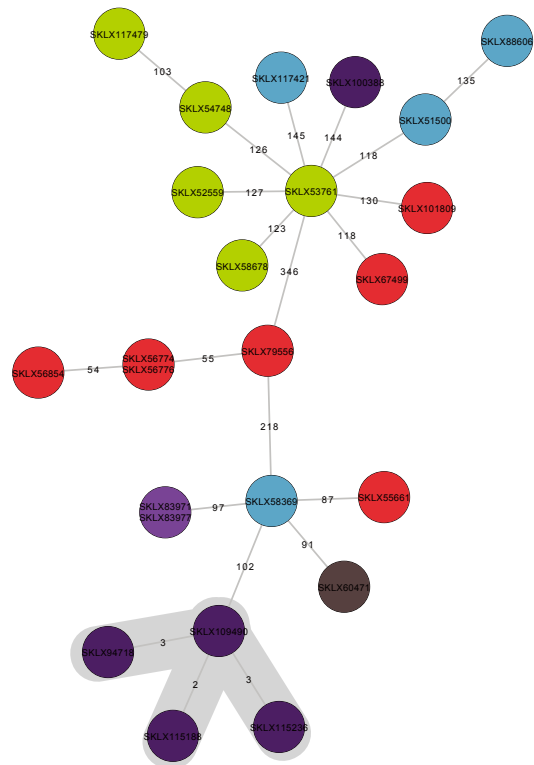

Location

● Anhui  
● Fujian  
● Heilongjiang  
● Jiangsu  
● Shandong  
● Zhejiang

**B**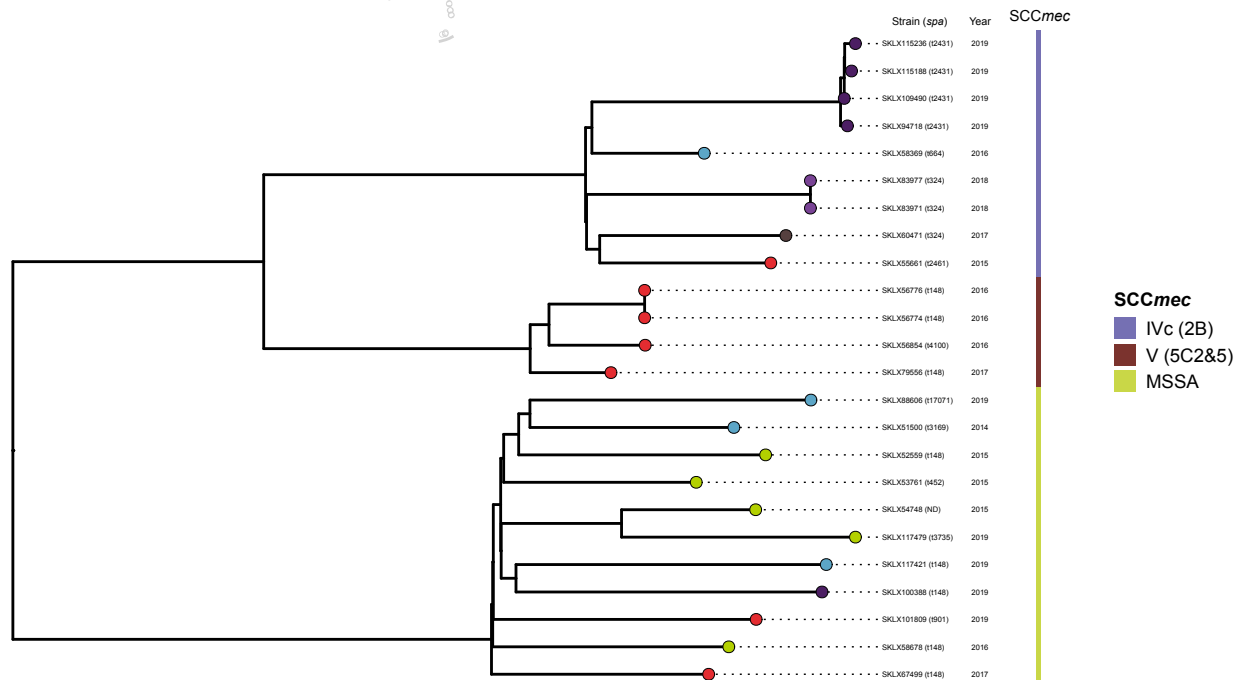

Tree scale: 0.003
