# Supplementary material for: Comparative Genomic Analysis Provides Insights into the Evolution and Genetic Diversity of Community-Genotype Sequence Type 72 Staphylococcus aureus Isolates
Source: PubMed Central journal article supplement (PMC8547429; doi:10.1128/msystems.00986-21), 2021-09-07

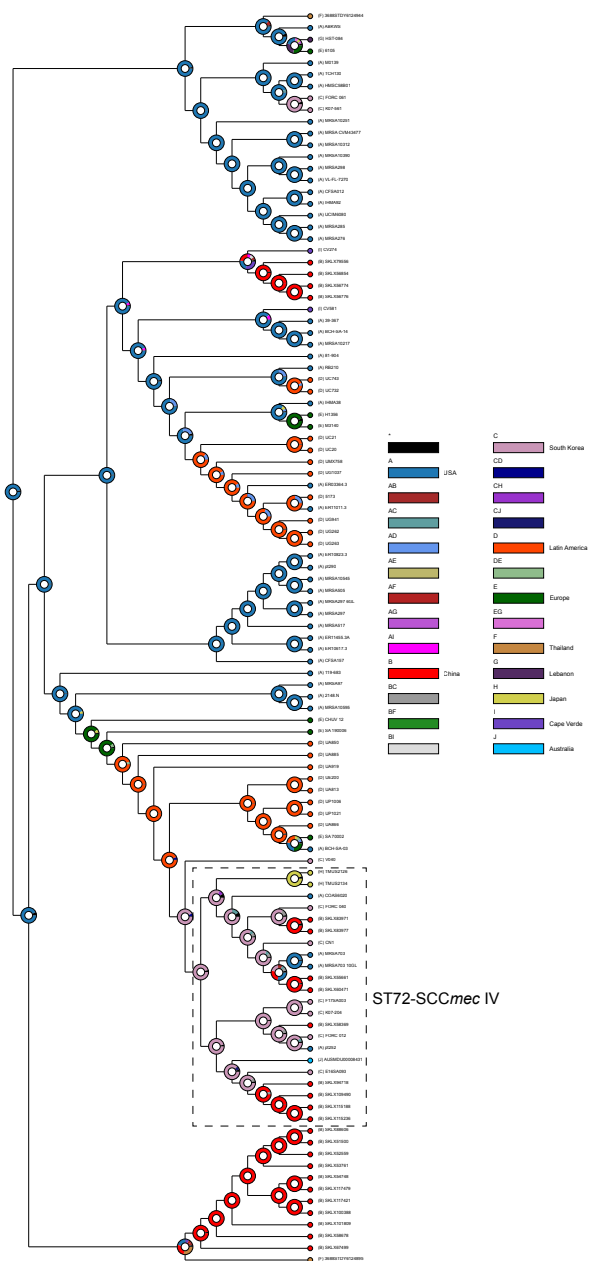

Supplement: msystems.00986-21-sf004.pdf [file msystems.00986-21-sf004.pdf]
